# Supplementary material
Source: PubMed Central journal article supplement (PMC8884112)
Supplement: NIHMS1776873-supplement-Supplementary_Table_1.pdf [file NIHMS1776873-supplement-Supplementary_Table_1.pdf]

Supplementary Table 1. Statistical analysis

| Figure   | Sample size (from left to right)           | Statistical test                                                                                                                                                      | P values               | F and DF |
|----------|--------------------------------------------|-----------------------------------------------------------------------------------------------------------------------------------------------------------------------|------------------------|----------|
| 1d       | 16 males (Pre)                             | Two-tailed one-way ANOVA with Sidak post hoc test.<br>Comparisons are with the pre-satiety group.                                                                     | p < 0.0001 (0 days)    | F = 32.4 |
|          | 14 males (0 days)                          |                                                                                                                                                                       | p < 0.0001 (1 day)     | DF = 6   |
|          | 20 males (1 day)                           |                                                                                                                                                                       | p = 0.013 (3 days)     |          |
|          | 14 males (3 days)                          |                                                                                                                                                                       |                        |          |
|          | 14 males (5 days)                          |                                                                                                                                                                       |                        |          |
|          | 11 males (7 days)                          |                                                                                                                                                                       |                        |          |
| 1e       | 7 males (9 days)                           | Two-tailed Fisher's exact test with Bonferroni correction.<br>Comparisons are with the pre-satiety group.                                                             | p < 0.0001 (0 days)    | DF = 6   |
|          | 30 trials (Pre)                            |                                                                                                                                                                       | p < 0.0001 (1 day)     |          |
|          | 18 trials (0 days)                         |                                                                                                                                                                       | p = 0.031 (3 days)     |          |
|          | 20 trials (1 day)                          |                                                                                                                                                                       |                        |          |
|          | 18 trials (3 days)                         |                                                                                                                                                                       |                        |          |
|          | 18 trials (5 days)                         |                                                                                                                                                                       |                        |          |
| 1f       | 12 trials (7 days)                         | Two-tailed one-way ANOVA with Sidak post hoc test. Two-tailed test. Comparisons are with the pre-satiety group.                                                       | p > 0.05 for all tests | F = 0.73 |
|          | 11 trials (9 days)                         |                                                                                                                                                                       |                        | DF = 6   |
|          | 16 males (Pre)                             |                                                                                                                                                                       |                        |          |
|          | 14 males (0 days)                          |                                                                                                                                                                       |                        |          |
|          | 20 males (1 day)                           |                                                                                                                                                                       |                        |          |
|          | 14 males (3 days)                          |                                                                                                                                                                       |                        |          |
| 1h       | 14 males (5 days)                          | Two-tailed one-way ANOVA with Sidak post hoc test.<br>Comparisons are with the pre-priming group and are made pair-wise per mouse.                                    | p = 0.023 (10 min)     | F = 4.88 |
|          | 11 males (7 days)                          |                                                                                                                                                                       | p = 0.039 (30 min)     | DF = 4   |
|          | 7 males (9 days)                           |                                                                                                                                                                       |                        |          |
|          | 7 males (Pre)                              |                                                                                                                                                                       |                        |          |
|          | 7 males (10 min)                           |                                                                                                                                                                       |                        |          |
|          | 7 males (30 min)                           |                                                                                                                                                                       |                        |          |
| 1i       | 7 males (60 min)                           | Two-tailed Fisher's exact test with Bonferroni correction.<br>Comparisons are with the pre-priming group.                                                             | p > 0.05 for all tests | DF = 4   |
|          | 7 males (120 min)                          |                                                                                                                                                                       |                        |          |
|          | 13 trials (Pre)                            |                                                                                                                                                                       |                        |          |
|          | 13 trials (10 min)                         |                                                                                                                                                                       |                        |          |
|          | 10 trials (30 min)                         |                                                                                                                                                                       |                        |          |
|          | 8 trials (60 min)                          |                                                                                                                                                                       |                        |          |
| 1j       | 8 trials (120 min)                         | Two-tailed one-way ANOVA with Sidak post hoc test.<br>Comparisons are with the pre-priming group and are made pair-wise per mouse.                                    | p = 0.043 (10 min)     | F = 7.29 |
|          | 7 males (Pre)                              |                                                                                                                                                                       | p = 0.009 (30 min)     | DF = 4   |
|          | 7 males (10 min)                           |                                                                                                                                                                       |                        |          |
|          | 7 males (30 min)                           |                                                                                                                                                                       |                        |          |
|          | 7 males (60 min)                           |                                                                                                                                                                       |                        |          |
|          | 7 males (120 min)                          |                                                                                                                                                                       |                        |          |
| 2d       | 8 males (AVPV Baseline with females, a)    | Two-tailed one-way ANOVA with Sidak post hoc test.<br>Comparisons are within each anatomical region. Hypothesis testing was done together with Extended Data Fig. 4d. | p < 0.0001 (a, b)      | F = 28.2 |
|          | 8 males (AVPV Satiated with females, b)    |                                                                                                                                                                       | p = 0.0014 (a, c)      | DF = 20  |
|          | 8 males (AVPV Baseline without females, c) |                                                                                                                                                                       | p = 0.0010 (b, c)      |          |
|          | 8 males (PVpo Baseline with females, d)    |                                                                                                                                                                       | p < 0.0001 (d, e)      |          |
|          | 8 males (PVpo Satiated with females, e)    |                                                                                                                                                                       | p < 0.0001 (e, f)      |          |
|          | 8 males (PVpo Baseline without females, f) |                                                                                                                                                                       |                        |          |
| 2g       | 7 males (DREADD Saline, a)                 | Two-tailed one-way ANOVA with Sidak post hoc test.<br>Comparisons are within DREADD and control groups.<br>Comparisons are also made pair-wise per mouse.             | p < 0.0001 (a, b)      | F = 17.0 |
|          | 7 males (DREADD C21, b)                    |                                                                                                                                                                       | p < 0.0001 (b, c)      | DF = 5   |
|          | 7 males (DREADD 24 hours after C21, c)     |                                                                                                                                                                       |                        |          |
|          | 7 males (Control Saline, d)                |                                                                                                                                                                       |                        |          |
|          | 7 males (Control C2, e)                    |                                                                                                                                                                       |                        |          |
|          | 7 males (Control 24 hours after C21, f)    |                                                                                                                                                                       |                        |          |
| 2h       | 21 trials (DREADD Saline, a)               | Two-tailed Fisher's exact test with Bonferroni correction.<br>Comparisons are within DREADD and control groups.                                                       | p < 0.0001 (a, b)      | DF = 5   |
|          | 21 trials (DREADD C21, b)                  |                                                                                                                                                                       | p < 0.0001 (b, c)      |          |
|          | 21 trials (DREADD 24 hours after C21, c)   |                                                                                                                                                                       |                        |          |
|          | 21 trials (Control Saline, d)              |                                                                                                                                                                       |                        |          |
|          | 21 trials (Control C2, e)                  |                                                                                                                                                                       |                        |          |
|          | 21 trials (Control 24 hours after C21, f)  |                                                                                                                                                                       |                        |          |
| 3b left  | 7 males (Pre)                              | Two-tailed one-way ANOVA with Sidak post hoc test.<br>Comparisons are with the pre-stim. group and are made pair-wise per mouse.                                      | p = 0.021 (10 min)     | F = 11.5 |
|          | 7 males (0 min)                            |                                                                                                                                                                       | p = 0.008 (30 min)     | DF = 8.3 |
|          | 7 males (10 min)                           |                                                                                                                                                                       |                        |          |
|          | 7 males (30 min)                           |                                                                                                                                                                       |                        |          |
|          | 7 males (60 min)                           |                                                                                                                                                                       |                        |          |
|          | 7 males (120 min)                          |                                                                                                                                                                       |                        |          |
| 3b right | 7 males (Pre)                              | Two-tailed one-way ANOVA with Sidak post hoc test.<br>Comparisons are with the pre-stim. group and are made pair-wise per mouse.                                      | p = 0.006 (10 min)     | F = 8.3  |
|          | 7 males (0 min)                            |                                                                                                                                                                       | p = 0.004 (30 min)     | DF = 5   |
|          | 7 males (10 min)                           |                                                                                                                                                                       |                        |          |
|          | 7 males (30 min)                           |                                                                                                                                                                       |                        |          |
|          | 7 males (60 min)                           |                                                                                                                                                                       |                        |          |
|          | 7 males (120 min)                          |                                                                                                                                                                       |                        |          |
| 3c left  | 6 males (Pre)                              | Two-tailed one-way ANOVA with Sidak post hoc test.<br>Comparisons are with the pre-stim. group and are made pair-wise per mouse.                                      | p = 0.003 (10 min)     | F = 21.0 |
|          | 6 males (0 min)                            |                                                                                                                                                                       | p = 0.001 (30 min)     | DF = 5   |
|          | 6 males (10 min)                           |                                                                                                                                                                       | p = 0.029 (60 min)     |          |
|          | 6 males (30 min)                           |                                                                                                                                                                       |                        |          |
|          | 6 males (60 min)                           |                                                                                                                                                                       |                        |          |
|          | 6 males (120 min)                          |                                                                                                                                                                       |                        |          |
| 3c right | 6 males (Pre)                              | Two-tailed one-way ANOVA with Sidak post hoc test.<br>Comparisons are with the pre-stim. group and are made pair-wise per mouse.                                      | p = 0.017 (10 min)     | F = 6.3  |
|          | 6 males (0 min)                            |                                                                                                                                                                       | p = 0.023 (30 min)     | DF = 5   |
|          | 6 males (10 min)                           |                                                                                                                                                                       |                        |          |
|          | 6 males (30 min)                           |                                                                                                                                                                       |                        |          |
|          | 6 males (60 min)                           |                                                                                                                                                                       |                        |          |
|          | 6 males (120 min)                          |                                                                                                                                                                       |                        |          |

| Figure           | Sample size (from left to right)                                                        | Statistical test                                                                                                                                                 | P values                                           | F and DF           |
|------------------|-----------------------------------------------------------------------------------------|------------------------------------------------------------------------------------------------------------------------------------------------------------------|----------------------------------------------------|--------------------|
| 3e               | 5 males (Pre)                                                                           | Two-tailed one-way ANOVA with Sidak post hoc test.<br>Comparisons are with the pre-stim. group and are made pair-wise per mouse.                                 | p = 0.015 (10 min)                                 | F = 11.8           |
|                  | 5 males (10 min)                                                                        |                                                                                                                                                                  | p = 0.004 (30 min)                                 | DF = 3             |
|                  | 5 males (30 min)                                                                        |                                                                                                                                                                  |                                                    |                    |
|                  | 5 males (60 min)                                                                        |                                                                                                                                                                  |                                                    |                    |
| 3f               | 5 males (Pre)                                                                           | Two-tailed one-way ANOVA with Sidak post hoc test.<br>Comparisons are with the pre-stim. group and are made pair-wise per mouse.                                 | p = 0.001                                          | F = 79.5           |
|                  | 5 males (10 min)                                                                        |                                                                                                                                                                  | p < 0.0001                                         | DF = 3             |
|                  | 5 males (30 min)                                                                        |                                                                                                                                                                  | p = 0.003                                          |                    |
|                  | 5 males (60 min)                                                                        |                                                                                                                                                                  |                                                    |                    |
| 3g               | 7 males (Female, a)<br>7 males (Stim., b)<br>5 males (Female + stim., c)                | Two-tailed one-way ANOVA with Sidak post hoc test.<br>Comparisons are between every pair of groups.                                                              | p < 0.0001 (a, c)<br>p < 0.0001 (b, c)             | F = 12.3<br>DF = 3 |
| 4c               | 9 fields of view from 3 males (Stim.)<br>8 fields of view from 3 males (No stim.)       | Two-tailed one-way ANOVA with Sidak post hoc test.<br>Comparisons are made pair-wise per field of view within each time point.                                   | p < 0.0001 (30 min)<br>p = 0.0032 (60 min)         | F = 13.3<br>DF = 5 |
| 4d               | 9 fields of view from 3 males (Prime)<br>9 fields of view from 3 males (Sham prime)     | Two-tailed one-way ANOVA with Sidak post hoc test.<br>Comparisons are made pair-wise per field of view within prime and sham prime groups.                       | p < 0.0001 (Prime)                                 | F = 16.2<br>DF = 3 |
| 4e               | 9 fields of view from 3 males (Satiety)<br>9 fields of view from 3 males (Sham satiety) | Two-tailed one-way ANOVA with Sidak post hoc test.<br>Comparisons are made pair-wise per field of view within satiety and sham satiety groups.                   | p < 0.0001 (Satiety)                               | F = 10.5<br>DF = 3 |
| 4i left          | 4 slices from 3 males                                                                   | Two-tailed one-way ANOVA with Sidak post hoc test.<br>Comparisons are between groups within each time point.                                                     | p = 0.041 (5 stims.)                               | F = 57.7           |
|                  |                                                                                         |                                                                                                                                                                  | p < 0.0001 (10 stims.)                             | DF = 9             |
|                  |                                                                                         |                                                                                                                                                                  | p < 0.0001 (15 stims.)                             |                    |
|                  |                                                                                         |                                                                                                                                                                  | p < 0.0001 (20 stims.)                             |                    |
| 4i right         | 4 slices from 3 males                                                                   | Two-tailed one-way ANOVA with Sidak post hoc test.<br>Comparisons are within pre- and post-agonist groups.                                                       | p < 0.0001 (post)                                  | F = 90.6<br>DF = 3 |
| 4j left          | 4 slices from 3 males                                                                   | Two-tailed one-way ANOVA with Sidak post hoc test.<br>Comparisons are within pre- and post-stim. groups.                                                         | p < 0.0001 (post)                                  | F = 71.1<br>DF = 3 |
| 4j right         | 4 slices from 3 males                                                                   | Two-tailed one-way ANOVA with Sidak post hoc test.<br>Comparisons are within pre- and post-agonist groups.                                                       | p > 0.05 for all tests                             | F = 1.9<br>DF = 9  |
| 4l right         | 8 slices from 3 males                                                                   | Two-tailed one-way ANOVA with Sidak post hoc test.<br>Comparisons are within light and no light groups.<br>Comparisons also made pair-wise per slice.            | p < 0.0001 (Light)                                 | F = 47.1<br>DF = 3 |
| 4m right         | 12 slices from 3 males                                                                  | Two-tailed one-way ANOVA with Sidak post hoc test.<br>Comparisons are within light and no light groups.<br>Comparisons also made pair-wise per slice.            | p > 0.05 for all tests                             | F = 0.12<br>DF = 3 |
| 4n left          | 12 males (No stim.)<br>12 males (Stim.)                                                 | Paired two-tailed t-test.                                                                                                                                        | p < 0.0001                                         | DF = 11            |
| 4n right         | 12 males (No stim.)<br>12 males (Stim.)                                                 | Paired two-tailed t-test.                                                                                                                                        | p < 0.0001                                         | DF = 11            |
| 4p right         | 11 slices from 3 males                                                                  | Two-tailed one-way ANOVA with Sidak post hoc test.<br>Comparisons are within light and no light groups.<br>Comparisons also made pair-wise per slice.            | p > 0.05 for all tests                             | F = 0.94<br>DF = 3 |
| 4q middle        | 6 males (Pre)                                                                           | Two-tailed one-way ANOVA with Sidak post hoc test.<br>Comparisons are with the pre-priming group and are made pair-wise per mouse.                               | p > 0.05 for all tests                             | F = 0.36           |
|                  | 6 males (10 min)                                                                        |                                                                                                                                                                  | DF = 4                                             |                    |
|                  | 6 males (30 min)                                                                        |                                                                                                                                                                  |                                                    |                    |
|                  | 6 males (60 min)                                                                        |                                                                                                                                                                  |                                                    |                    |
| 4q right         | 18 trials (Pre)                                                                         | Two-tailed one-way ANOVA with Sidak post hoc test.<br>Comparisons are with the pre-priming group.                                                                | p > 0.05 for all tests                             | DF = 4             |
|                  | 18 trials (10 min)                                                                      |                                                                                                                                                                  |                                                    |                    |
|                  | 18 trials (30 min)                                                                      |                                                                                                                                                                  |                                                    |                    |
|                  | 18 trials (60 min)                                                                      |                                                                                                                                                                  |                                                    |                    |
| Extended Data 1a | 7 males (Pre, a)                                                                        | Two-tailed Fisher's exact test with Bonferroni correction.<br>Comparisons are between every pair of groups.                                                      | p < 0.0001 (a, b)                                  | DF = 5             |
|                  | 6 males (Mating with intromission, b)                                                   |                                                                                                                                                                  | p < 0.0001 (b, c)                                  |                    |
|                  | 5 males (Mating no intromission, c)                                                     |                                                                                                                                                                  | p < 0.0001 (b, d)                                  |                    |
|                  | 6 males (Post, d)                                                                       |                                                                                                                                                                  |                                                    |                    |
| Extended Data 1b | 47 trials from 20 males                                                                 | Pearson correlation.                                                                                                                                             | p > 0.05 from the no-correlation null hypothesis   |                    |
| Extended Data 2b | 6 males (No stim.)<br>6 males (Stim.)                                                   | Paired two-tailed t-test.                                                                                                                                        | p = 0.011                                          | DF = 5             |
| Extended Data 2c | 6 males (No stim.)<br>6 males (Stim.)                                                   | Paired two-tailed t-test.                                                                                                                                        | p < 0.0001                                         | DF = 5             |
| Extended Data 2d | 6 trials (No stim.)<br>6 trials (Stim.)                                                 | Two-tailed Fisher's exact test.                                                                                                                                  |                                                    | DF = 1             |
| Extended Data 2k | 8 males (Baseline, a)                                                                   | Two-tailed one-way ANOVA with Sidak post hoc test.<br>Comparisons are within all-sniff and onsets-matched groups. Comparisons are also made pair-wise per mouse. | p < 0.0001 (a, b)                                  | F = 8.7            |
|                  | 6 males (Satiated, b)                                                                   |                                                                                                                                                                  | p < 0.0001 (c, d)                                  | DF = 2             |
|                  | 8 males (Baseline matched, c)                                                           |                                                                                                                                                                  |                                                    |                    |
|                  | 6 males (Satiated matched, d)                                                           |                                                                                                                                                                  |                                                    |                    |
| Extended Data 2l | 8 males (Baseline, a)                                                                   | Two-tailed one-way ANOVA with Sidak post hoc test.<br>Comparisons are within all-sniff and onsets-matched groups. Comparisons are also made pair-wise per mouse. | p < 0.0001 (a, b)                                  | F = 21.4           |
|                  | 6 males (Satiated, b)                                                                   |                                                                                                                                                                  | p < 0.0001 (c, d)                                  | DF = 2             |
|                  | 8 males (Baseline matched, c)                                                           |                                                                                                                                                                  |                                                    |                    |
|                  | 6 males (Satiated matched, d)                                                           |                                                                                                                                                                  |                                                    |                    |
| Extended Data 2p | 80 trials                                                                               | Pearson correlation.                                                                                                                                             | p < 0.0001 from the no-correlation null hypothesis |                    |
| Extended Data 2q | 50 trials                                                                               | Pearson correlation.                                                                                                                                             | p < 0.0001 from the no-correlation null hypothesis |                    |

| Figure           | Sample size (from left to right)                                                                                                                                                                                                                                                                                                                                                                                                                                                                                                                                                                                                                    | Statistical test                                                                                                                                        | P values                                           | F and DF            |
|------------------|-----------------------------------------------------------------------------------------------------------------------------------------------------------------------------------------------------------------------------------------------------------------------------------------------------------------------------------------------------------------------------------------------------------------------------------------------------------------------------------------------------------------------------------------------------------------------------------------------------------------------------------------------------|---------------------------------------------------------------------------------------------------------------------------------------------------------|----------------------------------------------------|---------------------|
| Extended Data 2t | 80 trials                                                                                                                                                                                                                                                                                                                                                                                                                                                                                                                                                                                                                                           | Pearson correlation.                                                                                                                                    | p < 0.0001 from the no-correlation null hypothesis |                     |
| Extended Data 2u | 50 trials                                                                                                                                                                                                                                                                                                                                                                                                                                                                                                                                                                                                                                           | Pearson correlation.                                                                                                                                    | p < 0.0001 from the no-correlation null hypothesis |                     |
| Extended Data 2d | 8 males (ADP Baseline with females, g)<br>8 males (ADP Satiated with females, h)<br>8 males (ADP Baseline without females, i)<br>4 males (PVa Baseline with females, j)<br>5 males (PVa Satiated with females, k)<br>4 males (PVi Baseline with females, l)<br>4 males (PVi Satiated with females, m)<br>4 males (Arc Baseline with females, n)<br>5 males (Arc Satiated with females, o)<br>4 males (Zl Baseline with females, p)<br>5 males (Zl Satiated with females, q)<br>4 males (SNc Baseline with females, r)<br>4 males (SNc Satiated with females, s)<br>4 males (VTA Baseline with females, t)<br>5 males (VTA Satiated with females, u) | Two-tailed one-way ANOVA with Sidak post hoc test.<br>Comparisons are within each anatomical region. Hypothesis testing was done together with Fig. 2d. | p > 0.05                                           | F = 28.2<br>DF = 20 |
| Extended Data 5g | 5 males (Saline)<br>5 males (C21)                                                                                                                                                                                                                                                                                                                                                                                                                                                                                                                                                                                                                   | Paired two-tailed t-test.                                                                                                                               | p = 0.013                                          | DF = 5              |
| Extended Data 5h | 5 males (Saline)<br>5 males (C21)                                                                                                                                                                                                                                                                                                                                                                                                                                                                                                                                                                                                                   | Paired two-tailed t-test.                                                                                                                               | p = 0.014                                          | DF = 5              |
| Extended Data 5i | 10 males (Saline)<br>10 males (C21)                                                                                                                                                                                                                                                                                                                                                                                                                                                                                                                                                                                                                 | Two-tailed one-way ANOVA with Sidak post hoc test.<br>Comparisons are between groups within each time point.                                            | p > 0.05 for all tests                             | F = 37.7<br>DF = 5  |
| Extended Data 5j | 10 males (Saline)<br>10 males (C21)                                                                                                                                                                                                                                                                                                                                                                                                                                                                                                                                                                                                                 | Two-tailed one-way ANOVA with Sidak post hoc test.<br>Comparisons are between groups within each time point.                                            | p > 0.05 for all tests                             | F = 6.5<br>DF = 5   |
| Extended Data 5k | 7 males (No stim., a)<br>9 males (Soma stim., b)<br>9 males (Axon stim., c)                                                                                                                                                                                                                                                                                                                                                                                                                                                                                                                                                                         | Two-tailed one-way ANOVA with Sidak post hoc test.<br>Comparisons are between every pair of groups.                                                     | p = 0.003 (a, b)<br>p = 0.036 (a, c)               | F = 7.7<br>DF = 2   |
| Extended Data 5l | 7 trials (No stim., a)<br>9 trials (Soma stim., b)<br>9 trials (Axon stim., c)                                                                                                                                                                                                                                                                                                                                                                                                                                                                                                                                                                      | Two-tailed Fisher's exact test with Bonferroni correction.<br>Comparisons are between every pair of groups.                                             | p = 0.005 (a, b)<br>p = 0.009 (a, c)               | DF = 2              |
| Extended Data 5m | 10 trials (Pre)<br>8 trials (0 min)<br>10 trials (10 min)<br>9 trials (30 min)<br>12 trials (60 min)<br>12 trials (120 min)                                                                                                                                                                                                                                                                                                                                                                                                                                                                                                                         | Two-tailed Fisher's exact test with Bonferroni correction.<br>Comparisons are with the pre-priming group.                                               | p > 0.05 for all tests                             | DF = 4              |
| Extended Data 5n | 6 males (Pre)<br>6 males (0 min)<br>6 males (10 min)<br>6 males (30 min)<br>6 males (60 min)<br>6 males (120 min)                                                                                                                                                                                                                                                                                                                                                                                                                                                                                                                                   | Two-tailed one-way ANOVA with Sidak post hoc test.<br>Comparisons are with the pre-stim. group and are made pair-wise per mouse.                        | p = 0.004 (10 min)<br>p = 0.02 (30 min)            | F = 7.8<br>DF = 5   |
| Extended Data 5o | 6 males (Pre)<br>6 males (0 min)<br>6 males (10 min)<br>6 males (30 min)<br>6 males (60 min)<br>6 males (120 min)                                                                                                                                                                                                                                                                                                                                                                                                                                                                                                                                   | Two-tailed one-way ANOVA with Sidak post hoc test.<br>Comparisons are with the pre-stim. group and are made pair-wise per mouse.                        | p = 0.004 (10 min)<br>p = 0.005 (30 min)           | F = 13.1<br>DF = 5  |
| Extended Data 5p | 13 trials (Pre)<br>14 trials (0 min)<br>14 trials (10 min)<br>14 trials (30 min)<br>14 trials (60 min)<br>14 trials (120 min)                                                                                                                                                                                                                                                                                                                                                                                                                                                                                                                       | Two-tailed Fisher's exact test with Bonferroni correction.<br>Comparisons are with the pre-priming group.                                               | p > 0.05 for all tests                             | DF = 5              |
| Extended Data 5q | 6 males (Pre)<br>6 males (0 min)<br>6 males (10 min)<br>6 males (30 min)                                                                                                                                                                                                                                                                                                                                                                                                                                                                                                                                                                            | Two-tailed one-way ANOVA with Sidak post hoc test.<br>Comparisons are with the pre-stim. group and are made pair-wise per mouse.                        | p = 0.0006 (0 min)<br>p = 0.006 (10min)            | F = 8.4<br>DF = 3   |
| Extended Data 5r | 9 trials (Pre)<br>8 trials (0 mn)<br>7 trials (10 min)<br>6 trials (30 min)                                                                                                                                                                                                                                                                                                                                                                                                                                                                                                                                                                         | Two-tailed Fisher's exact test with Bonferroni correction.<br>Comparisons are with the pre-priming group.                                               | p > 0.05 for all tests                             | DF = 3              |
| Extended Data 5s | 6 males (Pre)<br>6 males (0 min)<br>6 males (10 min)<br>6 males (30 min)                                                                                                                                                                                                                                                                                                                                                                                                                                                                                                                                                                            | Two-tailed one-way ANOVA with Sidak post hoc test.<br>Comparisons are with the pre-stim. group and are made pair-wise per mouse.                        | p = 0.012 (10 min)<br>p = 0.014 (30min)            | F = 16.7<br>DF = 3  |
| Extended Data 5t | 22 trials (Pre)<br>12 trials (0 min)<br>18 trials (10 min)<br>18 trials (30 min)<br>18 trials (60 min)<br>18 trials (120 min)                                                                                                                                                                                                                                                                                                                                                                                                                                                                                                                       | Two-tailed Fisher's exact test with Bonferroni correction.<br>Comparisons are with the pre-priming group.                                               | p > 0.05 for all tests                             | DF = 5              |
| Extended Data 5u | 10 trials (Pre)<br>7 trials (0 min)<br>7 trials (10 min)<br>8 trials (30 min)                                                                                                                                                                                                                                                                                                                                                                                                                                                                                                                                                                       | Two-tailed Fisher's exact test with Bonferroni correction.<br>Comparisons are with the pre-priming group.                                               | p > 0.05 for all tests                             | DF = 3              |

| Figure                 | Sample size (from left to right)                                                                                                                                                                       | Statistical test                                                                                                                           | P values                                                                                                                               | F and DF           |
|------------------------|--------------------------------------------------------------------------------------------------------------------------------------------------------------------------------------------------------|--------------------------------------------------------------------------------------------------------------------------------------------|----------------------------------------------------------------------------------------------------------------------------------------|--------------------|
| Extended Data 6h       | 7 males (No stim.)<br>7 males (Stim.)                                                                                                                                                                  | Paired two-tailed t-test.                                                                                                                  | $p = 0.017$                                                                                                                            | DF = 6             |
| Extended Data 6i       | 7 males (No stim.)<br>7 males (Stim.)                                                                                                                                                                  | Paired two-tailed t-test.                                                                                                                  | $p = 0.009$                                                                                                                            | DF = 6             |
| Extended Data 6j       | 14 trials (No Chrimson)<br>14 trials (Chrimson)                                                                                                                                                        | Two-tailed Fisher's exact test.                                                                                                            | $p > 0.05$ for all tests                                                                                                               | DF = 1             |
| Extended Data 7k       | 43 cells from 3 males (Responsive)<br>78 cells from 3 males (Unresponsive)                                                                                                                             | Two-tailed one-way ANOVA with Sidak post hoc test.<br>Comparisons are between groups within each time point.                               | $p < 0.0001$ (30 min)<br>$p < 0.0001$ (60 min)                                                                                         | F = 34.2<br>DF = 7 |
| Extended Data 7l       | 43 cells from 3 males                                                                                                                                                                                  | Pearson correlation.                                                                                                                       | $p = 0.03$ from the no-correlation null hypothesis                                                                                     |                    |
| Extended Data 8e       | 6 fields of view from 3 males (Prime)<br>6 fields of view from 3 males (Sham prime)                                                                                                                    | Two-tailed one-way ANOVA with Sidak post hoc test.<br>Comparisons are made pair-wise per field of view within prime and sham prime groups. | $p < 0.0001$ (Prime)                                                                                                                   | F = 18.9<br>DF = 3 |
| Extended Data 9f       | 4 slices from 3 males                                                                                                                                                                                  | Two-tailed one-way ANOVA with Sidak post hoc test.<br>Comparisons are between groups within each time point.                               | $p = 0.009$ (10 stims.)<br>$p < 0.0001$ (15 stims.)<br>$p < 0.0001$ (20 stims.)                                                        | F = 10.4<br>DF = 9 |
| Extended Data 9g       | 4 slices from 3 males                                                                                                                                                                                  | Two-tailed one-way ANOVA with Sidak post hoc test.<br>Comparisons are within pre- and post-agonist groups.                                 | $p = 0.002$ (post)                                                                                                                     | F = 71.6<br>DF = 3 |
| Extended Data 9i       | 4 slices from 3 males                                                                                                                                                                                  | Two-tailed one-way ANOVA with Sidak post hoc test.<br>Comparisons are within pre- and post-stim. groups.                                   | $p < 0.0001$ (post)                                                                                                                    | F = 39.3<br>DF = 3 |
| Extended Data 9j       | 4 slices from 3 males                                                                                                                                                                                  | Two-tailed one-way ANOVA with Sidak post hoc test.<br>Comparisons are between groups within each time point.                               | $p > 0.05$ for all tests                                                                                                               | F = 0.31<br>DF = 9 |
| Extended Data 9l       | 4 slices from 3 males                                                                                                                                                                                  | Two-tailed one-way ANOVA with Sidak post hoc test.<br>Comparisons are between groups within each time point.                               | $p > 0.05$ for all tests                                                                                                               | F = 1.82<br>DF = 9 |
| Extended Data 9m       | 4 slices from 3 males                                                                                                                                                                                  | Two-tailed one-way ANOVA with Sidak post hoc test.<br>Comparisons are within pre- and post-agonist groups.                                 | $p = 0.004$ (post)                                                                                                                     | F = 66.5<br>DF = 3 |
| Extended Data 9n       | 4 slices from 3 males                                                                                                                                                                                  | Two-tailed one-way ANOVA with Sidak post hoc test.<br>Comparisons are between groups within each time point.                               | $p > 0.05$ for all tests                                                                                                               | F = 0.81<br>DF = 9 |
| Extended Data 9o       | 4 slices from 3 males                                                                                                                                                                                  | Two-tailed one-way ANOVA with Sidak post hoc test.<br>Comparisons are within pre- and post-agonist groups.                                 | $p = 0.017$ (post)                                                                                                                     | F = 34.4<br>DF = 3 |
| Extended Data 9u left  | 4 slices from 3 males                                                                                                                                                                                  | Two-tailed one-way ANOVA with Sidak post hoc test.<br>Comparisons are between groups within each time point.                               | $p < 0.0001$ (5 stims.)<br>$p < 0.0001$ (10 stims.)<br>$p < 0.0001$ (15 stims.)<br>$p < 0.0001$ (20 stims.)                            | F = 52.3<br>DF = 9 |
| Extended Data 9u right | 4 slices from 3 males                                                                                                                                                                                  | Two-tailed one-way ANOVA with Sidak post hoc test.<br>Comparisons are within pre- and post-agonist groups.                                 | $p < 0.0001$ (post)                                                                                                                    | F = 38.4<br>DF = 3 |
| Extended Data 9v left  | 4 slices from 3 males                                                                                                                                                                                  | Two-tailed one-way ANOVA with Sidak post hoc test.<br>Comparisons are within pre- and post-stim. groups.                                   | $p < 0.0001$ (post)                                                                                                                    | F = 55.1<br>DF = 3 |
| Extended Data 9v right | 4 slices from 3 males                                                                                                                                                                                  | Two-tailed one-way ANOVA with Sidak post hoc test.<br>Comparisons are between groups within each time point.                               | $p > 0.05$ for all tests                                                                                                               | F = 3.16<br>DF = 9 |
| Extended Data 9w left  | 4 slices from 3 males                                                                                                                                                                                  | Two-tailed one-way ANOVA with Sidak post hoc test.<br>Comparisons are between groups within each time point.                               | $p > 0.05$ for all tests                                                                                                               | F = 2.25<br>DF = 9 |
| Extended Data 9w right | 4 slices from 3 males                                                                                                                                                                                  | Two-tailed one-way ANOVA with Sidak post hoc test.<br>Comparisons are within pre- and post-agonist groups.                                 | $p = 0.004$ (post)                                                                                                                     | F = 44.3<br>DF = 3 |
| Extended Data 10b      | 3 groups of 5 oocytes (Control, a)<br>3 groups of 5 oocytes (bPAC dark, b)<br>3 groups of 5 oocytes (bPAC light, c)<br>3 groups of 5 oocytes (biPAC dark, d)<br>3 groups of 5 oocytes (biPAC light, e) | Two-tailed one-way ANOVA with Sidak post hoc test.<br>Comparisons are between every pair of groups.                                        | $p < 0.0001$ (a, c)<br>$p = 0.0005$ (a, e)<br>$p < 0.0001$ (b, c)<br>$p = 0.0008$ (b, e)<br>$p < 0.0001$ (c, d)<br>$p = 0.0005$ (d, e) | F = 91.1<br>DF = 4 |
| Extended Data 10g      | 35 trials from 12 males (No stim.)<br>36 trials from 12 males (Stim.)                                                                                                                                  | Two-tailed Fisher's exact test.                                                                                                            | $p > 0.05$                                                                                                                             | DF = 1             |
| Extended Data 10h      | 6 males (No stim.)<br>6 males (Stim.)                                                                                                                                                                  | Paired two-tailed t-test.                                                                                                                  | $p > 0.05$                                                                                                                             | DF = 5             |
| Extended Data 10i      | 6 males (No stim.)<br>6 males (Stim.)                                                                                                                                                                  | Paired two-tailed t-test.                                                                                                                  | $p > 0.05$                                                                                                                             | DF = 5             |
| Extended Data 10j      | 18 trials (No stim.)<br>18 trials (Stim.)                                                                                                                                                              | Two-tailed Fisher's exact test.                                                                                                            | $p > 0.05$                                                                                                                             | DF = 1             |
